# Supplementary material for: Inferring Drug Set and Identifying the Mechanism of Drugs for PC3
Source: MDPI journal article supplement (doi:10.3390/ijms25020765), 2024-01-07
Supplement: s1 [file s1]

Table S1. Unique drugs of each cluster from rank3

| Drugs in cluster1          | Drugs in cluster2        | Drugs in cluster3             |
|----------------------------|--------------------------|-------------------------------|
| 15-deltaprostaglandinJ2    | deferoxamine             | alpha-estradiol               |
| 17-allylamino-geldanamycin | fisetin                  | butein                        |
| celecoxib                  | genistein                | butirosin                     |
| coppersulfate              | Valproic acid            | dimethyloxalylglycine         |
| diclofenac                 | 4,5-dianilinophthalimide | docosahexaenoicacidethylester |
| fasudil                    |                          | estradiol                     |
| imatinib                   |                          | fulvestrant                   |
| indometacin                |                          | mercaptopurine                |
| LY-294002                  |                          | monastrol                     |
| monorden                   |                          | resveratrol                   |
| novobiocin                 |                          | splitomicin                   |
| pirinixicacid              |                          | U0125                         |
| rofecoxib                  |                          | HNMPA-(AM)3                   |
| rosiglitazone              |                          |                               |
| sodiumphenylbutyrate       |                          |                               |
| tetraethylenepentamine     |                          |                               |
| tretinoin                  |                          |                               |
| trichostatinA              |                          |                               |
| trogglitazone              |                          |                               |
| TTNPB                      |                          |                               |
| Valproic acid              |                          |                               |

Table S2 drug interaction in cluster2 in page9

|                                    | alpha-estradiol | diclofenac | estradiol | fulvestrant | genistein | imatinib | mercaptopurine |
|------------------------------------|-----------------|------------|-----------|-------------|-----------|----------|----------------|
| alpha-estradiol(ethinylestradiol)  |                 |            |           |             |           |          |                |
| diclofenac                         | –               |            |           |             |           |          |                |
| estradiol                          | +               | –          |           |             |           |          |                |
| fulvestrant                        | +               | –          |           |             |           |          |                |
| genistein                          | –               |            | –         |             |           |          |                |
| imatinib                           | –               | –          | –         |             | –         |          |                |
| mercaptopurine                     |                 | –          | –         |             |           | +        |                |
| resveratrol                        |                 |            |           |             |           |          | +              |
| rosiglitazone                      |                 | –          |           |             | –         | –        |                |
| tetraethylenepentamine(colestipol) |                 | –          | –         |             |           |          |                |
| tretinoin                          |                 | +          | –         |             |           | +        |                |
| valproicacid                       | +               | –          | +         | –           | –         | +        | –              |
